# Supplementary material for: Discoidin Domain Receptor 1 Regulates Runx2 during Osteogenesis of Osteoblasts and Promotes Bone Ossification via Phosphorylation of p38
Source: MDPI journal article supplement (doi:10.3390/ijms21197210), 2020-09-29
Supplement: s1 [file s1]

# Discoidin Domain Receptor 1 Regulates Runx2 during Osteogenesis of Osteoblasts and Promotes Bone Ossification via Phosphorylation of p38

Liang-Yin Chou, Chung-Hwan Chen, Shu-Chun Chuang, Tsung-Lin Cheng, Yi-Hsiung Lin, Hsin-Chiao Chou, Yin-Chih Fu, Yan-Hsiung Wang and Chau-Zen Wang

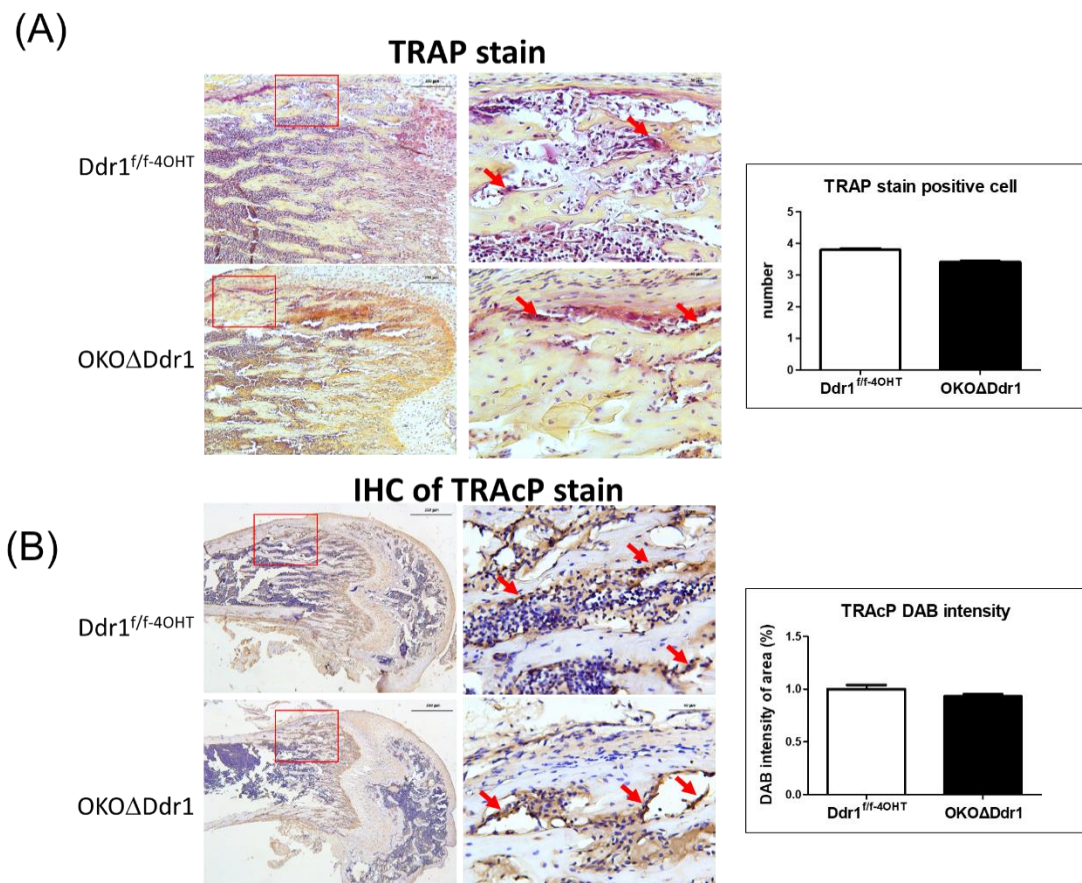

**Figure 1.** Knockout *Ddr1* in osteoblasts have no influence the osteoclasts. (A) TRAP staining the osteoclasts at 4-week-old mice femur. The magnifications were 100× and 400×, and the scale bars were 250 and 50 μm. Red arrow: TRAP positive cells. Quantification of TRAP positive cell in area. (B) IHC of TRAcP which was an osteoclast (OC) marker at 4-week-old femur mice. Red arrow: TRAcP positive cells. Quantification of TRAP intensity in area. Each groups more  $n = 8$ .
